# Supplementary material
Source: publisher figshare collection journal article supplement (https://acs.figshare.com/ndownloader/files/4379344)
Supplement: Supplementary file 1 [file 4379344]

## Supporting Information

### Incorporation and Exclusion of Long Chain Alkyl Halides in Fatty Acid Monolayers at the Air-Water Interface

*M. Roxana Sierra-Hernández and Heather C. Allen\**

allen@chemistry.ohio-state.edu

#### **Analysis of Orientation Angle**

Weidemann et al<sup>1</sup> determined by X-ray diffraction that the chains of PA at a pH of 2 were tilted by 25° at 10 mN/m, by 16° at 18 mN/m, and by 0° at 25 mN/m. In a different study<sup>2</sup> at 30 °C, a tilt angle of 21.4° at 15 mN/m and 5.3° at 30 mN/m were determined for PA. Since the dPA orientation changes in the TC phase to the UC phase<sup>1,2</sup>, the square root of the intensity will slightly overestimate the number density. To determine the overestimation, orientational angle of the terminal methyl group (CD<sub>3</sub>) plots at different polarizations are used (Figure S-1). The orientation angle ( $\Theta$ ) of the CD<sub>3</sub> can be estimated from the relationship  $\alpha = 35.5^\circ - \Theta$ .<sup>3,4</sup>, where  $\alpha$  is the chain tilt angle. At 18 mN/m, Weidemann et al<sup>1</sup> determined  $\alpha$  to be 16° (and therefore  $\Theta$  is 19.5°). With this information a theoretical ssp/ppp ratio for the CD<sub>3</sub> ss was estimated from Figure S-4 and compared to the experimental ssp/ppp ratio obtained from our SFG spectra. The theoretical ssp/ppp ratio obtained is of 11.5, whereas the experimental ratio was 12. This yields an overestimate of number density of 4%.

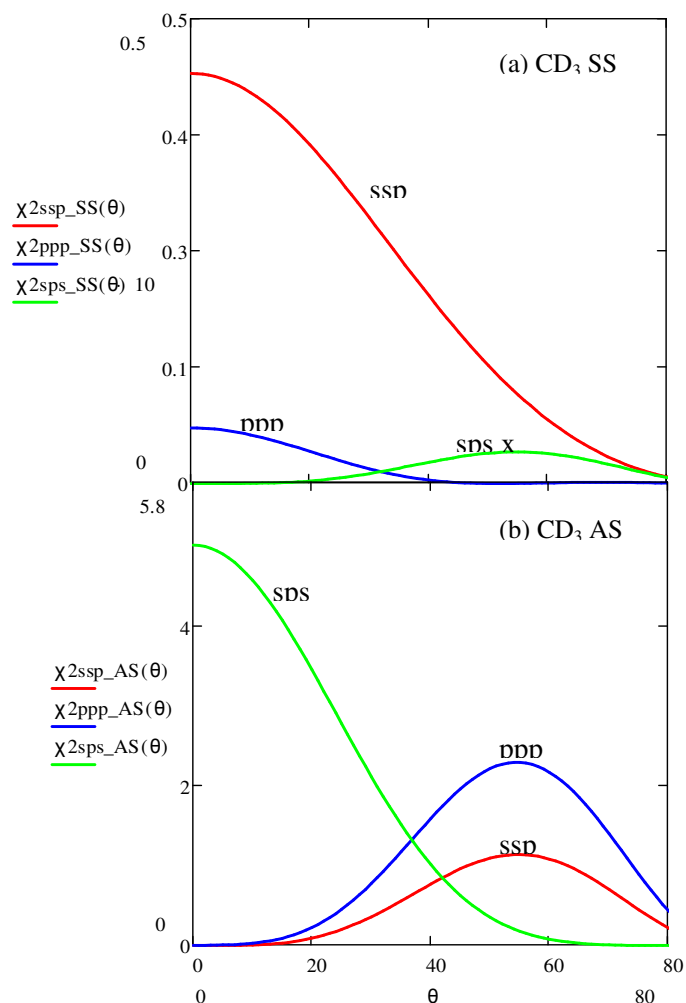

Figure S-1. Orientational angle ( $\theta$ ) at ssp, ppp, and sps polarizations for the (a) CD<sub>3</sub> symmetric stretch (SS) group and (b) CD<sub>3</sub> asymmetric stretch (AS) group.

## References

- (1) Weidemann, G.; Brezesinski, G.; Vollhardt, D.; Bringezu, F.; de Meijere, K.; Mohwald, H. *J. Phys. Chem. B* **1998**, *102*, 148-153.
- (2) Lee, K. Y. C.; Gopal, A.; von Nahmen, A.; Zasadzinski, J. A.; Majewski, J.; Smith, G. S.; Howes, P. B.; Kjaer, K. *J. Chem. Phys.* **2002**, *116*, 774.
- (3) Conboy, J. C.; Messmer, M. C.; Richmond, G. L. *J. Phys. Chem. B* **1997**, *101*, 6724-6733.
- (4) Guyot-Sionnest, P.; Hunt, J. H.; Shen, Y. R. *Phys. Rev. E* **1987**, *59*, 1597-1600.
